# Supplementary material for: Divergence of RNA localization between rat and mouse neurons reveals the potential for rapid brain evolution
Source: PubMed Central journal article supplement (PMC4203888; doi:10.1186/1471-2164-15-883), 2014-10-09

A

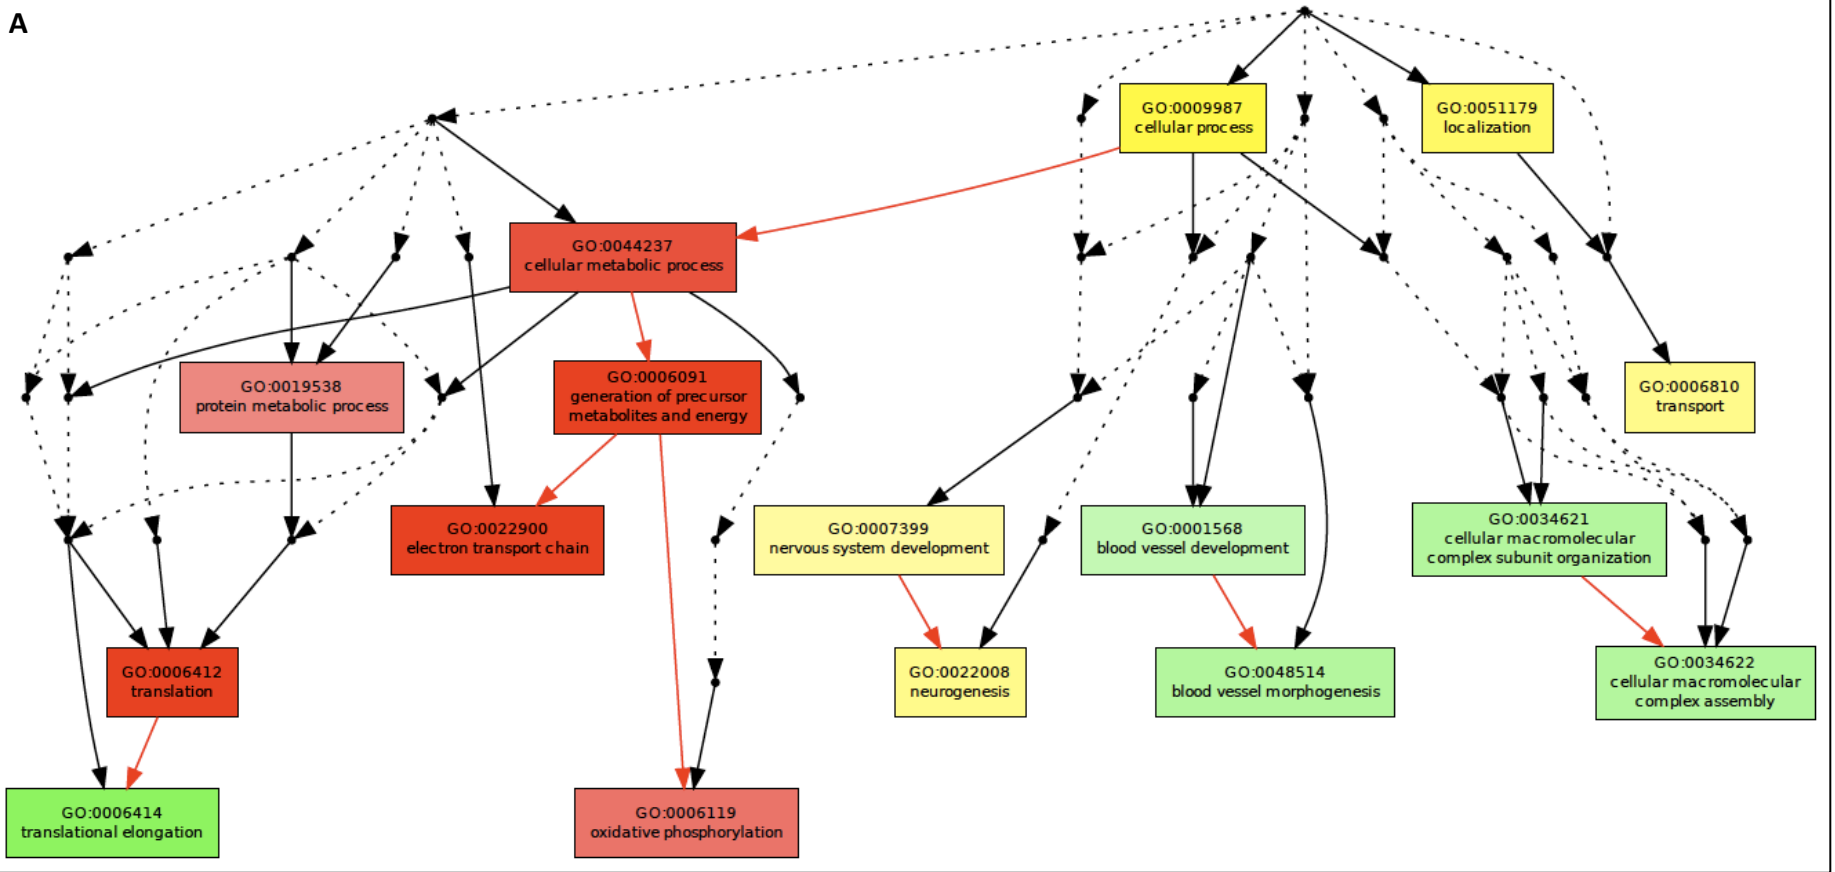

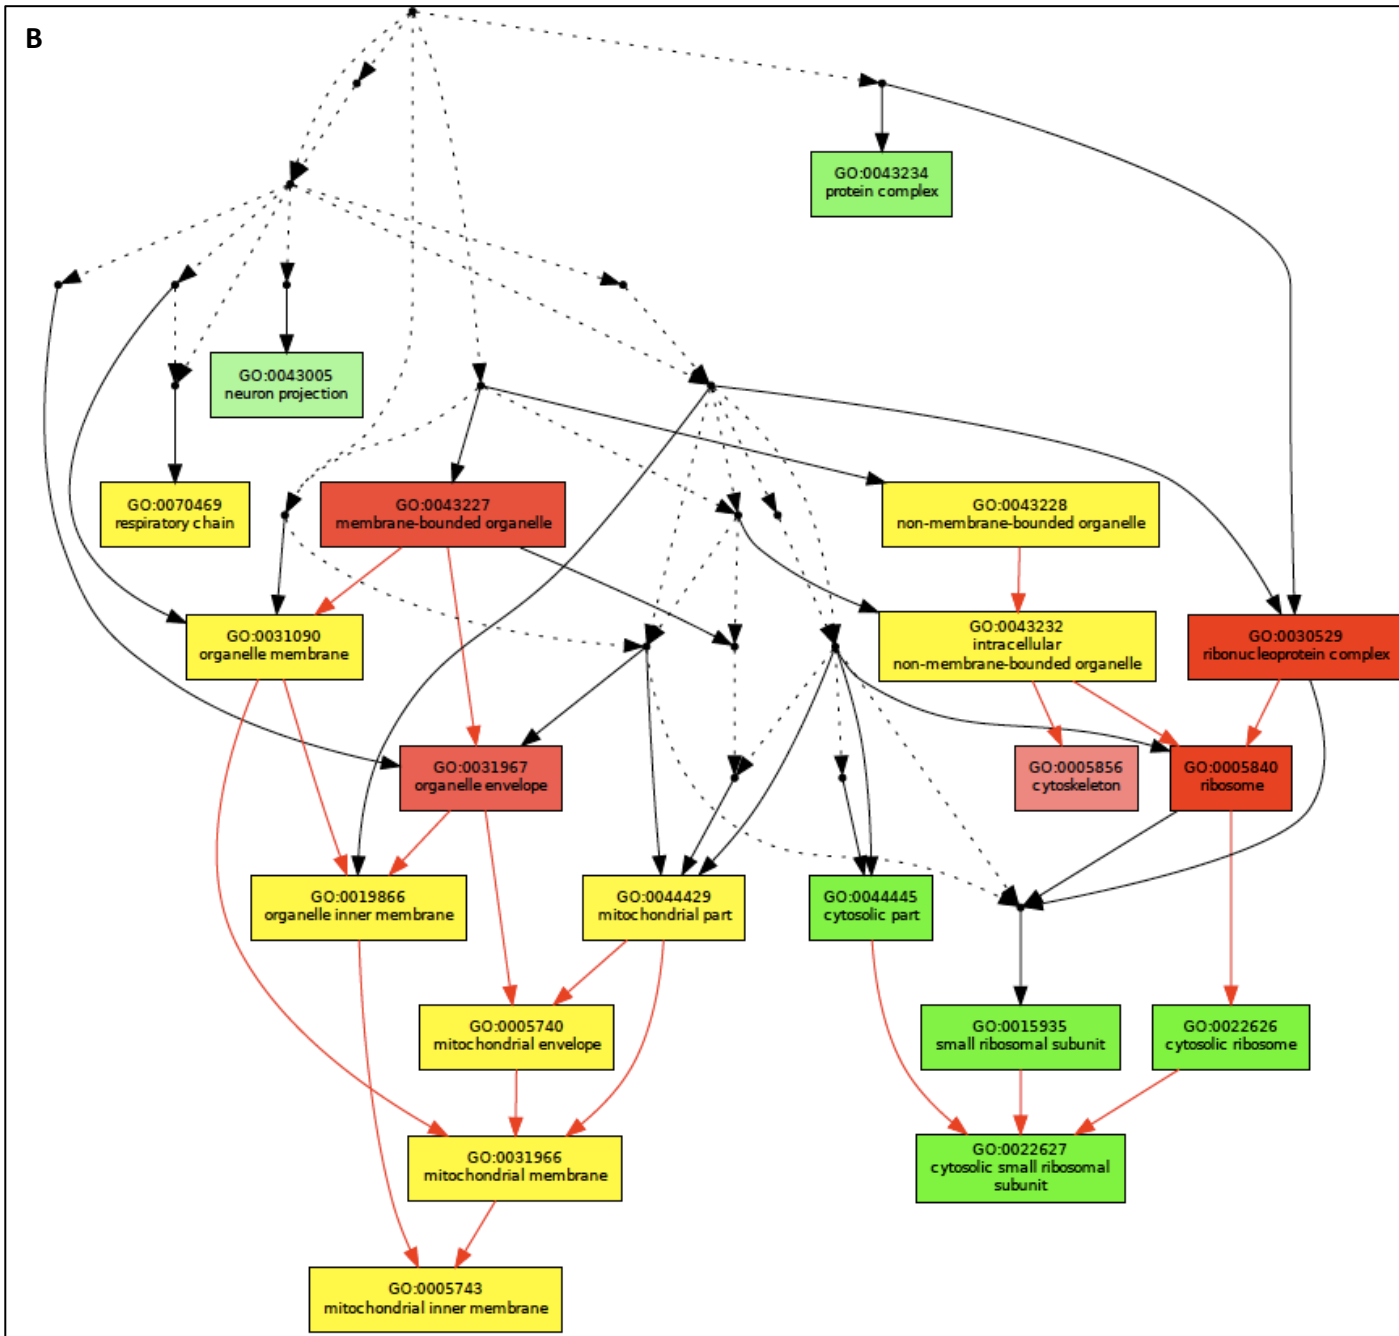

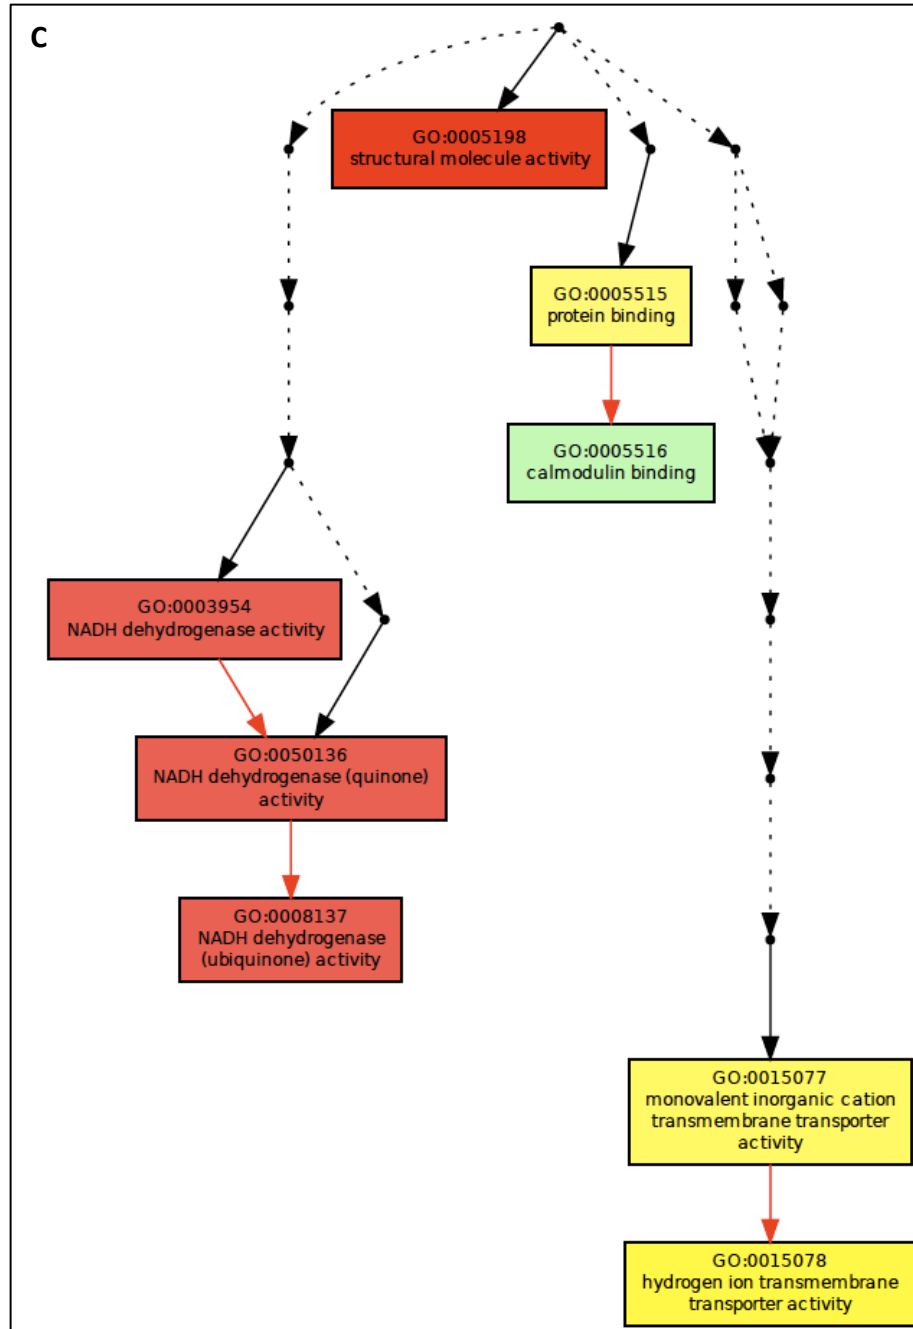

Supplement: 12864_2013_6562_MOESM4_ESM.pdf [file 12864_2013_6562_MOESM4_ESM.pdf]
